# Supplementary material for: Engineering of a wheat germ expression system to provide compatibility with a high throughput pET-based cloning platform
Source: PubMed Central journal article supplement — J Struct Funct Genomics. 2010 Jun 24;11(3):201–9. doi: 10.1007/s10969-010-9093-8 (PMC2921493; doi:10.1007/s10969-010-9093-8), 2010-06-24
Supplement: 10969_2010_9093_MOESM1_ESM.pdf [file 10969_2010_9093_MOESM1_ESM.pdf]

## **Supporting Information**

### **Engineering of the TnT Wheat Germ Expression System to Provide Compatibility with a High Throughput pET-based Cloning Platform**

**Li Zhao<sup>1,2</sup>, Kate Zhao<sup>3</sup>, Robin Hurst<sup>3</sup>, Michael Slater<sup>3</sup>, Thomas A Acton<sup>2,4</sup>, G.V.T. Swapna<sup>2,4</sup>, Ritu Shastry<sup>2,4</sup>, Gregory J. Kornhaber<sup>2,4</sup>, and Gaetano T. Montelione<sup>1,2,4,\*</sup>**

*<sup>1</sup>Center for Advanced Biotechnology and Medicine, Robert Wood Johnson Medical School, University of Medicine and Dentistry of New Jersey, Piscataway, New Jersey 08854*

*<sup>2</sup>Northeast Structural Genomics Consortium*

*<sup>3</sup>Promega Corp., 2800 Woods Hollow Road, Madison, Wisconsin, 53711*

*<sup>4</sup>Center for Advanced Biotechnology and Medicine, Department of Molecular biology and Biochemistry, Rutgers, The State University of New Jersey, Piscataway, New Jersey 08854*

*\*To whom correspondence should be addressed.*

Email: [guy@cabm.rutgers.edu](mailto:guy@cabm.rutgers.edu)

Originally presented at the NIGMS Protein Structure Initiative Workshop on Enabling Technologies for Structure Biology, March 4 – 6, 2009

Table S1: Expression and solubility characteristics of 59 human proteins, produced intracellularly in *Escherichia coli* and in the cell-free expression system TNT® SP6 High-Yield Wheat Germ Cell-Free (Promega).

| NESG Target ID  | MW<br>(kDa) | <i>E. coli</i> Expression |            |               | WGCF Expression |            |               |
|-----------------|-------------|---------------------------|------------|---------------|-----------------|------------|---------------|
|                 |             | E<br>(1-5)                | S<br>(1-5) | ES<br>product | E<br>(1-5)      | S<br>(1-5) | ES<br>product |
| HR2886          | 38.09       | 5                         | 2          | 10            | 4               | 4          | 16            |
| HR2887          | 36.99       | 0                         | 0          | 0             | 5               | 5          | 25            |
| HR2889          | 23.79       | 5                         | 2          | 10            | 4               | 3          | 12            |
| HR2891          | 12.57       | 4                         | 3          | 12            | 4               | 3          | 12            |
| HR2894A         | 12.9        | 0                         | 0          | 0             | 4               | 2          | 8             |
| HR2894B         | 13.3        | 0                         | 0          | 0             | 3               | 2          | 6             |
| HR2894C         | 13.9        | 0                         | 0          | 0             | 0               | 0          | 0             |
| HR2895B-1-59    | 8.5         | 0                         | 0          | 0             | 0               | 0          | 0             |
| HR2895B-1-63    | 8.9         | 0                         | 0          | 0             | 0               | 0          | 0             |
| HR2902A-239-350 | 14.4        | 0                         | 0          | 0             | 4               | 3          | 12            |
| HR2902A-239-356 | 15.1        | 0                         | 0          | 0             | 5               | 3          | 15            |
| HR2902A-245-350 | 13.8        | 0                         | 0          | 0             | 5               | 3          | 15            |
| HR2902A-245-356 | 14.4        | 0                         | 0          | 0             | 1               | 3          | 3             |
| HR2909A-110-211 | 13.3        | 0                         | 0          | 0             | 5               | 2          | 10            |
| HR2909A-110-218 | 14.1        | 0                         | 0          | 0             | 5               | 2          | 10            |
| HR2909A-115-218 | 13.6        | 0                         | 0          | 0             | 5               | 2          | 10            |
| HR2909B-212-312 | 13.2        | 0                         | 0          | 0             | 2               | 2          | 4             |
| HR2909B-216-312 | 12.8        | 0                         | 0          | 0             | 2               | 2          | 4             |
| HR2909C-1-110   | 14.1        | 4                         | 0          | 0             | 5               | 2          | 10            |
| HR2909C-1-115   | 14.7        | 3                         | 0          | 0             | 5               | 2          | 10            |
| HR2909C-14-110  | 12.8        | 5                         | 0          | 0             | 4               | 3          | 12            |
| HR2909C-14-115  | 13.3        | 0                         | 0          | 0             | 4               | 3          | 12            |
| HR2909C-7-110   | 13.6        | 5                         | 0          | 0             | 2               | 3          | 6             |
| HR2924          | 37.76       | 5                         | 0          | 0             | 4               | 5          | 20            |
| HR2928          | 32.15       | 0                         | 0          | 0             | 5               | 4          | 20            |
| HR2930          | 21.26       | 0                         | 0          | 0             | 5               | 4          | 20            |
| HR2934          | 22.91       | 0                         | 0          | 0             | 5               | 4          | 20            |
| HR2951          | 29.73       | 0                         | 0          | 0             | 5               | 5          | 25            |
| HR2965          | 34.46       | 5                         | 1          | 5             | 5               | 5          | 25            |
| HR3007          | 30.83       | 5                         | 4          | 20            | 5               | 4          | 20            |
| HR3023A         | 13.7        | 0                         | 0          | 0             | 0               | 0          | 0             |
| HR3047          | 21.59       | 0                         | 0          | 0             | 5               | 5          | 25            |
| HR3051          | 34.68       | 4                         | 5          | 20            | 5               | 5          | 25            |
| HR3057          | 14.66       | 5                         | 5          | 25            | 4               | 3          | 12            |
| HR3068A         | 14.2        | 5                         | 0          | 0             | 2               | 2          | 4             |
| HR3082A-32-125  | 12.5        | 0                         | 0          | 0             | 0               | 0          | 0             |
| HR3111          | 15.1        | 0                         | 0          | 0             | 4               | 3          | 12            |
| HR3123A         | 13.1        | 0                         | 0          | 0             | 5               | 3          | 15            |
| HR3123C         | 12.6        | 2                         | 4          | 8             | 4               | 2          | 8             |
| HR3123E         | 12          | 0                         | 0          | 0             | 4               | 2          | 8             |
| HR3123F         | 16.2        | 0                         | 0          | 0             | 2               | 2          | 4             |
| HR3141A         | 11.7        | 0                         | 0          | 0             | 1               | 5          | 5             |
| HR3141C         | 10.6        | 0                         | 0          | 0             | 1               | 4          | 4             |

|                        |       |   |   |    |   |   |    |
|------------------------|-------|---|---|----|---|---|----|
| HR3445C                | 15.1  | 5 | 0 | 0  | 5 | 2 | 10 |
| HR3461D                | 13.7  | 5 | 5 | 25 | 5 | 3 | 15 |
| HR3597B                | 13.1  | 2 | 4 | 8  | 3 | 3 | 9  |
| HR3646E                | 14.2  | 4 | 4 | 16 | 3 | 5 | 15 |
| HR4443A                | 12.2  | 5 | 0 | 0  | 1 | 5 | 5  |
| HR4635B                | 10.9  | 0 | 0 | 0  | 5 | 1 | 5  |
| HR5272B                | 16    | 0 | 0 | 0  | 0 | 0 | 0  |
| HR5513A                | 13.2  | 4 | 5 | 20 | 5 | 5 | 25 |
| HR5521A                | 12.8  | 0 | 0 | 0  | 3 | 2 | 6  |
| HR5523A                | 13.1  | 0 | 0 | 0  | 5 | 2 | 10 |
| HR5526A                | 14    | 3 | 2 | 6  | 5 | 2 | 10 |
| HR5527A                | 14.9  | 0 | 0 | 0  | 3 | 3 | 9  |
| HR5528A                | 14.4  | 4 | 4 | 16 | 4 | 2 | 8  |
| HR5529A                | 14.8  | 5 | 5 | 25 | 5 | 1 | 5  |
| HR5537A                | 15.8  | 4 | 5 | 20 | 4 | 4 | 16 |
| HT97 (Human Ubiquitin) | 10.22 | 5 | 5 | 25 | 5 | 5 | 25 |
